# Supplementary material
Source: publisher figshare collection journal article supplement (https://gsajournals.figshare.com/ndownloader/files/15368753)
Supplement: Supplementary file 1 [file 15368753]

## Sheet: Sheet1
Table S1: List of differentially regulated genes in STAT supercompetitors (p<0.05)
Flybase ID	Gene	Fold Change	Adjusted p-value
FBgn0004864	hop	16.5692	4.73202e-180
FBgn0267798	CR46123	11.5202	1.86655e-22
FBgn0052475	mthl8	10.577	2.2697e-21
FBgn0050428	CG30428	8.46083	5.86634e-20
FBgn0029761	SK	5.90068	8.15174e-27
FBgn0267582	CR45922	5.29922	1.144e-11
FBgn0086758	chinmo	4.73673	5.43873e-23
FBgn0029762	NAAT1	4.36336	1.0614e-07
FBgn0052192	CG32192	4.30424	6.24555e-08
FBgn0033731	Cpr49Ah	4.30245	4.35271e-19
FBgn0036690	Ilp8	3.91323	8.01e-13
FBgn0037260	Mur82C	3.84803	2.53075e-06
FBgn0037503	CG14598	3.75361	4.35271e-19
FBgn0031645	CG3036	3.70112	1e-14
FBgn0034286	dpr13	3.6671	2.64802e-06
FBgn0013279	Hsp70Bc	3.31719	9.69832e-06
FBgn0029881	pigs	3.27152	3.4e-13
FBgn0034684	CG13501	3.2656	4.88054e-05
FBgn0053868	His2B:CG33868	3.26393	7.93906e-06
FBgn0010383	Cyp18a1	3.21474	4.26277e-05
FBgn0053508	ppk13	3.1351	1.506e-12
FBgn0036899	tey	3.12466	1.99571e-17
FBgn0037975	CG3397	3.11092	0.000132524
FBgn0260997	CG42598	3.06905	0.00012379
FBgn0024250	brk	2.96646	1.48059e-10
FBgn0042101	CG18744	2.88548	0.000513535
FBgn0008646	E5	2.87653	0.000224957
FBgn0039972	CG17018	2.84747	1.27396e-05
FBgn0039647	sda	2.81735	2.33361e-23
FBgn0039089	beat-IV	2.80648	0.000757492
FBgn0000576	ems	2.67975	8.54277e-09
FBgn0266984	CR45435	2.66922	0.00155271
FBgn0029663	CG10804	2.60537	0.000494354
FBgn0033863	CG13337	2.5905	0.000801886
FBgn0033469	CG12133	2.55335	0.00263274
FBgn0035168	cep290	2.54582	4.26277e-05
FBgn0030395	Mks1	2.52943	0.000815977
FBgn0010041	GstD5	2.45017	0.000933153
FBgn0051354	Hsp70Bbb	2.44604	0.00461673
FBgn0259739	CG42393	2.44464	0.00345238
FBgn0032525	Hsp60D	2.44155	0.00277269
FBgn0259703	CG42357	2.43309	0.00503096
FBgn0031361	CG17652	2.42556	4.73033e-05
FBgn0039807	CG15546	2.4221	3.43764e-05
FBgn0005778	PpD5	2.41927	0.00345544
FBgn0014859	Hr38	2.41605	2.88804e-09
FBgn0267569	CR45909	2.41185	0.00161101
FBgn0265416	Neto	2.41088	0.00508012
FBgn0039092	CG16723	2.35911	0.00503096
FBgn0053509	CG33509	2.35706	0.000250397
FBgn0267033	mamo	2.34224	6.24555e-08
FBgn0026415	Idgf4	2.32893	0.000954549
FBgn0052476	mthl14	2.32682	0.000720086
FBgn0261291	CheA86a	2.32051	0.00838956
FBgn0000071	Ama	2.31965	4.10932e-06
FBgn0001138	grn	2.31331	1.10667e-10
FBgn0040251	Ugt86Di	2.31017	1.23183e-06
FBgn0035581	CG17150	2.30827	0.00946981
FBgn0024992	CG2658	2.30299	2.43216e-06
FBgn0038946	rdhB	2.30076	0.00944491
FBgn0030540	CG11581	2.29878	0.00983213
FBgn0267086	CR45530	2.29716	0.000188324
FBgn0038840	CG5621	2.29137	0.00527131
FBgn0052082	CG32082	2.29053	2.79039e-09
FBgn0004573	5-HT7	2.28598	0.0105601
FBgn0263106	DnaJ-1	2.278	0.00206687
FBgn0033791	Drl-2	2.2669	0.00829836
FBgn0052591	CG32591	2.26673	0.00416029
FBgn0031364	CG17648	2.2658	0.0117689
FBgn0034820	CG13538	2.26426	0.011775
FBgn0050203	CG30203	2.25657	0.012296
FBgn0266261	CG44956	2.25405	0.0017104
FBgn0028888	CG4168	2.253	0.0100207
FBgn0000092	CG2650	2.2521	0.00511175
FBgn0035089	Phk-3	2.24904	2.50511e-05
FBgn0264432	CG43850	2.24596	0.00807711
FBgn0035170	dpr20	2.23806	0.0006936
FBgn0035171	CG12502	2.23674	0.00436072
FBgn0283427	FASN1	2.22715	1.0398e-08
FBgn0033708	CG8850	2.2141	0.00884171
FBgn0001230	Hsp68	2.21178	0.0147673
FBgn0034681	CG9308	2.20753	0.0147413
FBgn0015569	alpha-Est10	2.20412	0.000687382
FBgn0052625	CG32625	2.20149	0.013648
FBgn0051076	CG31076	2.19644	0.00766448
FBgn0032405	CG14946	2.19608	0.000167271
FBgn0032400	CG6770	2.19576	1.17958e-06
FBgn0003065	CG2150	2.18827	0.00503096
FBgn0267243	CR45683	2.17452	0.0104169
FBgn0031164	CG1724	2.17109	0.018568
FBgn0037992	CG4702	2.1676	0.000782359
FBgn0259821	CG42402	2.1622	0.00138447
FBgn0031749	CG14000	2.15923	0.0182592
FBgn0086348	se	2.15491	0.0075182
FBgn0033679	CG8888	2.15184	0.00676829
FBgn0036494	Toll-6	2.14723	0.0190829
FBgn0028699	Rh50	2.14462	0.0196943
FBgn0001225	Hsp26	2.14184	0.000250397
FBgn0030207	CG2887	2.13595	0.0165535
FBgn0028360	Cdc7	2.1349	9.50738e-08
FBgn0029895	CG14441	2.13433	0.000352877
FBgn0045500	Gr22b	2.12827	0.0218571
FBgn0266633	CR45140	2.12744	0.0217042
FBgn0266940	CR45391	2.12388	0.022131
FBgn0001229	Hsp67Bc	2.12363	0.000122659
FBgn0030258	CG1552	2.12127	0.0151318
FBgn0263412	CR43458	2.11629	0.0167122
FBgn0085288	CG34259	2.11486	0.0148518
FBgn0035124	ttm2	2.11213	0.00249976
FBgn0037475	Fer1	2.11207	0.0244077
FBgn0039094	CG10184	2.11046	0.013055
FBgn0023214	edl	2.10571	0.00209445
FBgn0052865	alphagamma-element:CR32865	2.10538	0.00317438
FBgn0267820	CR46145	2.10275	0.000523176
FBgn0037520	CG18268	2.099	0.0245313
FBgn0028481	CG4341	2.09175	0.0264311
FBgn0030356	CR32661	2.09073	0.0245569
FBgn0010109	dpn	2.08913	0.00046141
FBgn0038951	CG5380	2.08755	0.00210182
FBgn0035469	CG14977	2.08609	0.000254997
FBgn0035468	Gr63a	2.08589	7.30403e-06
FBgn0263593	Lpin	2.08178	0.011827
FBgn0013275	Hsp70Aa	2.07848	0.0135515
FBgn0033913	CG8468	2.07635	5.44349e-05
FBgn0004898	fd96Cb	2.07395	0.00966726
FBgn0010042	GstD6	2.07317	0.018568
FBgn0035847	mthl7	2.07291	0.0135162
FBgn0029728	CG2861	2.07207	0.0179467
FBgn0029717	CG12684	2.06834	0.0214408
FBgn0040465	Dip3	2.06705	0.00907854
FBgn0265067	CR44178	2.06624	0.00232644
FBgn0029659	CG16782	2.0662	0.0179861
FBgn0011244	Hsp60B	2.06442	0.0179861
FBgn0029716	CG3546	2.05408	0.0269508
FBgn0011706	rpr	2.05197	0.00656601
FBgn0032522	CG16848	2.05034	0.0209785
FBgn0010039	GstD3	2.05022	0.000392168
FBgn0037521	CG2993	2.04724	0.0185054
FBgn0266003	CR44777	2.04572	0.0192754
FBgn0014465	Cp7Fb	2.04538	0.0187758
FBgn0036449	bmm	2.04396	0.000200404
FBgn0030041	CG12116	2.03949	0.0290546
FBgn0010040	GstD4	2.03894	0.0167122
FBgn0011758	B-H1	2.0387	0.0154864
FBgn0034520	lms	2.03176	0.0111826
FBgn0014032	Sptr	2.02903	0.00743365
FBgn0036181	Muc68Ca	2.02778	0.00174389
FBgn0033072	CG17994	2.0259	0.034197
FBgn0264087	Slob	2.01908	0.0104796
FBgn0029167	Hml	2.0158	0.00560945
FBgn0001168	h	2.01397	0.00317438
FBgn0040001	FASN3	2.01199	0.0300179
FBgn0035577	CG13708	2.00932	0.0245313
FBgn0033680	CG13186	2.00722	0.037576
FBgn0000535	eag	2.00682	0.0130435
FBgn0003950	unc	2.00665	0.0176597
FBgn0033926	Arc1	2.00616	0.00443933
FBgn0035539	slow	2.00502	7.06671e-06
FBgn0033732	CG13157	2.00443	0.0244077
FBgn0265447	CR44347	2.00067	0.0398808
FBgn0036014	CG3222	2.00046	0.00693701
FBgn0262616	CR43142	1.99691	0.01815
FBgn0036796	CG18231	1.9958	0.0245313
FBgn0265646	CR44453	1.99529	0.0410516
FBgn0029661	CG16781	1.99207	0.0285795
FBgn0050046	CG30046	1.98883	0.0416932
FBgn0040354	CG14418	1.98844	0.0373769
FBgn0033712	CG13163	1.98822	0.0139351
FBgn0011236	ken	1.98793	1.95366e-05
FBgn0040364	CG11378	1.98423	0.042162
FBgn0034053	Cyp4aa1	1.98262	0.0222286
FBgn0027111	miple1	1.98227	4.90501e-06
FBgn0266239	CR44934	1.97797	0.0385176
FBgn0036809	CG12477	1.97523	0.0429331
FBgn0264719	CR43987	1.97233	0.045023
FBgn0259701	CG42355	1.96672	0.0286247
FBgn0266884	CR45345	1.96669	0.0437989
FBgn0031844	CG13771	1.96613	0.0216087
FBgn0011603	ine	1.96523	0.00639778
FBgn0024993	CG2662	1.96305	0.00466665
FBgn0039471	CG6295	1.96137	0.0475272
FBgn0027376	rha	1.96028	0.00804557
FBgn0035708	CG8398	1.96019	0.0230511
FBgn0260653	serp	1.95951	4.86597e-09
FBgn0039463	CG18472	1.95789	0.0086965
FBgn0041182	Tep2	1.9569	0.000210525
FBgn0031918	CG6055	1.94893	0.0495903
FBgn0030038	CG1440	1.94774	0.000566455
FBgn0053867	His-Psi:CR33867	1.94656	0.0495011
FBgn0034579	mRpL54	1.94561	0.00802568
FBgn0261992	CG42810	1.94457	0.0485548
FBgn0266938	CR45389	1.9441	0.048075
FBgn0085427	CG34398	1.94204	0.0010096
FBgn0036089	CG14151	1.94191	0.013055
FBgn0265996	CR44771	1.94058	0.0364334
FBgn0035710	SP1173	1.9394	9.72819e-06
FBgn0036043	CG8177	1.93922	0.0315387
FBgn0052091	CG32091	1.93854	0.000392168
FBgn0036795	CG18233	1.93661	0.0356982
FBgn0038018	Tim17a1	1.93655	0.00185364
FBgn0086708	stv	1.93564	0.00476548
FBgn0031610	CG15436	1.93494	0.00678254
FBgn0030617	CG9095	1.93356	0.0103364
FBgn0085243	CG34214	1.93016	0.0482984
FBgn0261341	verm	1.9289	9.2511e-10
FBgn0000075	amd	1.92528	0.00946981
FBgn0262880	CG43235	1.92444	0.0446664
FBgn0004652	fru	1.92311	0.00117654
FBgn0039937	fd102C	1.92214	0.000971688
FBgn0036381	CG8745	1.91664	0.0227324
FBgn0015801	Reg-5	1.91619	0.00351855
FBgn0259834	out	1.91553	0.00327466
FBgn0250910	Octbeta3R	1.91547	0.0086965
FBgn0083123	Uhg5	1.91493	0.000525081
FBgn0085261	CG34232	1.90312	0.0104796
FBgn0022774	Oat	1.90163	0.00804557
FBgn0035023	ITP	1.90067	0.00201502
FBgn0014466	Cp7Fc	1.90037	0.0473066
FBgn0264494	CG17646	1.90009	0.00970853
FBgn0025387	CG12184	1.89932	0.00485277
FBgn0051204	CG31204	1.89816	0.00807711
FBgn0033468	CG1418	1.89743	0.0105261
FBgn0022770	Peritrophin-A	1.89688	0.0179467
FBgn0035167	Gr61a	1.89651	0.0220591
FBgn0026077	Gasp	1.89164	0.000807259
FBgn0010105	comm	1.88833	0.000654729
FBgn0286782	CG8213	1.88407	0.00165825
FBgn0052207	CR32207	1.88343	0.0131415
FBgn0035480	CG14984	1.88223	0.00422269
FBgn0052457	CG32457	1.88079	0.0302944
FBgn0040801	CG13053	1.88057	0.0269176
FBgn0033574	Spn47C	1.88044	0.00880842
FBgn0033268	Obp44a	1.87987	0.0298277
FBgn0038151	yellow-e2	1.87961	0.00663914
FBgn0053777	CG33777	1.87849	0.0302944
FBgn0041184	Socs36E	1.87807	4.58777e-06
FBgn0053136	CG33136	1.87694	0.0149992
FBgn0261560	Thor	1.87382	0.00500073
FBgn0030596	CG12398	1.87222	0.0283776
FBgn0264442	ab	1.86955	0.00101166
FBgn0267960	CR46240	1.86768	0.0322455
FBgn0002926	ndl	1.8666	0.0478796
FBgn0032414	CG17211	1.86653	0.000250397
FBgn0052521	CG32521	1.86326	0.0210521
FBgn0002562	Lsp1alpha	1.85891	0.0498846
FBgn0051665	wry	1.85777	0.0464798
FBgn0004607	zfh2	1.85581	2.13738e-10
FBgn0283525	CG4749	1.85467	0.0130435
FBgn0038017	CG4115	1.8541	0.003213
FBgn0086906	sls	1.85402	0.0495011
FBgn0085425	CG34396	1.8527	0.00310314
FBgn0266246	CR44941	1.85117	0.0218761
FBgn0085386	CG34357	1.85065	0.00503096
FBgn0038014	CG10041	1.84971	0.00430032
FBgn0038150	yellow-e3	1.84821	0.0327469
FBgn0265730	CR44537	1.84689	0.0406673
FBgn0033777	CG17574	1.84674	0.00966726
FBgn0031971	Sirup	1.84228	0.00805402
FBgn0030039	CG12123	1.84003	0.0246818
FBgn0034301	CG5756	1.83938	0.00087568
FBgn0041711	yellow-e	1.83748	0.0167122
FBgn0052085	CG32085	1.83674	0.0235069
FBgn0264707	RhoGEF3	1.83564	0.00108677
FBgn0038326	CG5044	1.83274	0.00927117
FBgn0013812	Dhc93AB	1.8303	0.00012379
FBgn0032401	Plzf	1.82746	0.0274722
FBgn0000422	Ddc	1.82608	0.00663513
FBgn0001078	ftz-f1	1.82542	0.00345344
FBgn0051436	CG31436	1.82009	0.0245313
FBgn0003209	raw	1.81951	0.001269
FBgn0264748	CG44006	1.81923	0.0403601
FBgn0051633	CG31633	1.8155	0.0346037
FBgn0086558	Ubi-p5E	1.81244	0.000255113
FBgn0035206	CG9186	1.81169	0.00447187
FBgn0037473	CG10068	1.81164	0.0479377
FBgn0040322	GNBP2	1.81067	0.0317996
FBgn0264324	spg	1.80998	0.00441865
FBgn0267796	CG46121	1.80898	0.00627316
FBgn0038407	CG6126	1.80569	0.0249054
FBgn0029856	CG11700	1.8055	0.0289452
FBgn0263256	CG43394	1.80034	0.00416029
FBgn0033252	CG12769	1.79921	0.0131415
FBgn0261611	CG42700	1.79853	0.0205642
FBgn0041224	Gr97a	1.79604	0.0472637
FBgn0034162	CG6426	1.7959	0.0222286
FBgn0040299	Myo28B1	1.79524	0.0167122
FBgn0031365	CG17650	1.7936	0.0490048
FBgn0260745	mfas	1.79003	3.37144e-06
FBgn0030597	Eo	1.79001	0.032384
FBgn0030065	CG12075	1.78993	0.00345279
FBgn0003716	tkv	1.78976	3.98721e-05
FBgn0039324	CG10553	1.78953	0.0083529
FBgn0053002	mRpL27	1.78825	0.0222259
FBgn0030394	Cpr11A	1.78672	0.0412866
FBgn0036985	zye	1.78599	0.0208746
FBgn0039331	ND-49L	1.7848	0.0467443
FBgn0058006	CG40006	1.78464	0.00673365
FBgn0024997	CG2681	1.77894	0.0412729
FBgn0035049	Mmp1	1.77775	0.00254328
FBgn0259242	CG42340	1.7769	0.0431084
FBgn0035557	CG11353	1.77499	0.0299919
FBgn0284084	wg	1.77146	3.68908e-06
FBgn0053196	dp	1.77053	0.000293345
FBgn0036652	CG13032	1.76946	0.0276844
FBgn0053229	CG33229	1.76911	0.00882113
FBgn0016694	Pdp1	1.76763	0.00327974
FBgn0283531	Duox	1.76587	0.00238638
FBgn0031360	CG31937	1.7655	0.0184754
FBgn0037320	CG14668	1.76393	0.0379325
FBgn0286785	scb	1.76309	0.00503096
FBgn0034182	CG9640	1.76035	0.0411139
FBgn0029662	CG12206	1.75953	0.00143572
FBgn0261258	rgn	1.75919	0.00317438
FBgn0083985	CG34149	1.75614	0.0443286
FBgn0039329	CG10669	1.75585	0.0236501
FBgn0028480	CG17841	1.75443	0.000495212
FBgn0038950	CG5382	1.75298	0.0356982
FBgn0038740	CG4562	1.7526	0.000515732
FBgn0041160	comm2	1.75247	0.01815
FBgn0264953	Piezo	1.75219	0.00267325
FBgn0260657	CG42540	1.7511	0.015446
FBgn0030396	CG2556	1.74992	0.0379175
FBgn0051145	CG31145	1.74859	0.032384
FBgn0052364	tut	1.74808	0.047995
FBgn0052537	CG32537	1.74421	0.0195947
FBgn0267073	CR45517	1.74324	0.043129
FBgn0262035	CG42846	1.74169	0.042162
FBgn0037890	CG17734	1.74139	0.00129029
FBgn0043903	dome	1.74076	1.76923e-06
FBgn0085482	CG34453	1.74035	0.0266146
FBgn0031044	MKP-4	1.73559	0.00112525
FBgn0034262	swi2	1.73468	0.0478191
FBgn0038855	CG5745	1.73395	0.0379175
FBgn0040636	CG13255	1.7305	0.0146294
FBgn0259791	bora	1.72993	0.023219
FBgn0011589	Elk	1.7257	0.0477409
FBgn0263200	Galt	1.72504	0.0259073
FBgn0010223	Galphaf	1.72346	0.0114505
FBgn0030077	CG15365	1.72263	0.00327974
FBgn0011653	mas	1.71947	0.000176187
FBgn0003068	per	1.7152	0.0326414
FBgn0040259	Ugt86Da	1.71364	0.0060192
FBgn0024806	DIP2	1.71308	0.000334826
FBgn0042131	CG18808	1.71203	0.0326414
FBgn0024920	Ts	1.70912	0.0254562
FBgn0003867	tsl	1.70689	0.00161963
FBgn0032538	CG16885	1.70638	0.0435813
FBgn0042206	GstD10	1.70313	0.0138276
FBgn0039346	CG5079	1.70312	0.0218598
FBgn0026079	Nsun2	1.70272	0.00845147
FBgn0039462	CG14252	1.69891	0.032384
FBgn0053635	CG33635	1.69879	0.037576
FBgn0053181	CG33181	1.69839	0.00511175
FBgn0036415	CG7768	1.69735	0.0114611
FBgn0035888	CG7120	1.69699	0.0316055
FBgn0033649	pyr	1.69695	0.00772146
FBgn0038803	CG5191	1.6962	0.0100207
FBgn0002592	E(spl)m2-BFM	1.6931	0.0262481
FBgn0038720	CG6231	1.69152	0.00808257
FBgn0002633	E(spl)m7-HLH	1.69133	0.0304919
FBgn0005771	noc	1.69087	0.0180119
FBgn0014184	Oda	1.68994	0.000921615
FBgn0053643	CG33643	1.68573	0.0390096
FBgn0036732	Oatp74D	1.68546	7.19126e-05
FBgn0016076	vri	1.68452	0.0101868
FBgn0265042	Irk1	1.68451	0.00147955
FBgn0024947	NTPase	1.68143	0.00246661
FBgn0285944	para	1.67873	0.000414183
FBgn0267913	CR46194	1.67793	0.0127752
FBgn0015828	TfIIEalpha	1.67723	0.0186944
FBgn0015371	chn	1.67541	0.000169522
FBgn0033265	coil	1.67489	0.02108
FBgn0028325	l(1)G0334	1.67429	0.0133486
FBgn0039321	CG10550	1.67419	0.0471599
FBgn0001311	kkv	1.6723	2.79039e-06
FBgn0031142	r-cup	1.67183	0.0416932
FBgn0002932	neur	1.67008	0.000653504
FBgn0250755	CG42233	1.66981	0.043614
FBgn0028647	CG11902	1.668	0.0104468
FBgn0265194	Trpm	1.66767	0.0129741
FBgn0034985	CG3328	1.66331	3.92649e-05
FBgn0015229	glec	1.66003	0.0214707
FBgn0263973	jv	1.65931	0.0286922
FBgn0039467	CG14253	1.65882	0.0258229
FBgn0261588	pdm3	1.6586	0.000605327
FBgn0027580	PCB	1.6582	0.000766649
FBgn0038952	CG7069	1.65612	0.012296
FBgn0001253	ImpE1	1.65557	0.0246018
FBgn0030794	CG13005	1.6536	0.0453072
FBgn0261436	DhpD	1.65265	0.0251035
FBgn0037481	MAGE	1.65168	0.0322767
FBgn0032685	CG10211	1.64987	0.00202597
FBgn0000719	fog	1.64804	0.0101925
FBgn0030600	hiw	1.64783	0.0266125
FBgn0022382	Pka-R2	1.6462	0.0387156
FBgn0002023	Lim3	1.64533	0.0495011
FBgn0033688	Prp8	1.64237	0.014004
FBgn0023407	B4	1.63772	0.00552989
FBgn0286051	CG8368	1.634	0.0178636
FBgn0030520	Pdcd4	1.63335	0.0017104
FBgn0262109	CR42862	1.63177	0.00164685
FBgn0038020	GstD9	1.62931	0.0330383
FBgn0000008	a	1.6289	0.0315446
FBgn0266698	CR45188	1.62742	0.0435813
FBgn0052594	be	1.62326	0.0153077
FBgn0035696	Best2	1.62297	0.00560945
FBgn0017448	CG2187	1.62175	0.0483868
FBgn0034021	CG8180	1.62141	0.00266192
FBgn0031799	Pez	1.62092	0.00110322
FBgn0022787	Hel89B	1.61811	0.00920799
FBgn0263490	mld	1.61708	0.000408955
FBgn0039347	CG5071	1.61644	0.0490048
FBgn0264078	Flo2	1.61504	0.00231926
FBgn0035439	CG14961	1.6142	0.0412871
FBgn0003130	Poxn	1.61269	0.0496448
FBgn0028468	rtet	1.6116	0.0490048
FBgn0042185	CG18769	1.61104	0.0361186
FBgn0062413	Ctr1A	1.60606	0.00142743
FBgn0000723	FER	1.60437	0.000720086
FBgn0039875	sip3	1.60414	0.00545302
FBgn0052626	AMPdeam	1.6039	0.00182122
FBgn0025525	bab2	1.60345	0.00258081
FBgn0259143	CG42258	1.6033	0.00760262
FBgn0034725	CG6044	1.60265	0.034383
FBgn0267977	mh	1.60263	0.0408756
FBgn0030598	CG9503	1.59819	0.0291932
FBgn0020257	Ppa	1.59546	0.01039
FBgn0002778	mnd	1.59211	0.0102999
FBgn0002306	sas	1.5921	0.00345344
FBgn0037028	CG3618	1.58949	0.0448753
FBgn0034408	sano	1.5884	0.00201579
FBgn0011020	Sas-4	1.58611	0.0460491
FBgn0001222	Hsf	1.58528	0.02108
FBgn0039844	CG1607	1.58445	0.000474113
FBgn0261545	CG42663	1.58156	0.00344465
FBgn0001981	esg	1.57863	0.00946981
FBgn0034897	Sesn	1.5743	0.0186944
FBgn0260795	NaPi-III	1.57398	0.00441865
FBgn0039326	CG10562	1.57266	0.047995
FBgn0032482	Pect	1.57146	0.0451703
FBgn0286788	Orc1	1.57123	0.0435813
FBgn0016797	fz2	1.56932	4.10932e-06
FBgn0085376	CG34347	1.56927	0.0214488
FBgn0030791	CG9132	1.5688	0.0193026
FBgn0013718	nuf	1.56847	0.000719909
FBgn0001149	GstD1	1.56582	0.000657503
FBgn0034914	CG5554	1.56123	0.0160442
FBgn0014861	Mcm2	1.56091	0.0313952
FBgn0086251	del	1.56022	0.0385176
FBgn0024291	Sir2	1.55945	0.0075182
FBgn0039754	CG9747	1.55619	0.0263741
FBgn0011760	ctp	1.55136	0.00210182
FBgn0011656	Mef2	1.55119	0.00696755
FBgn0035844	CG13676	1.54891	5.29319e-05
FBgn0003016	osp	1.54447	0.00178391
FBgn0001233	Hsp83	1.54184	0.00711941
FBgn0035131	mthl9	1.53938	0.0303786
FBgn0031359	Rim2	1.53887	0.0186944
FBgn0263773	fok	1.53735	0.034015
FBgn0034722	Rtf1	1.53654	0.028097
FBgn0034540	Lrt	1.53549	0.0412866
FBgn0038412	Zip89B	1.53538	0.0279043
FBgn0034718	wdp	1.53088	0.012409
FBgn0263048	CG43343	1.53002	0.0123941
FBgn0033402	Myd88	1.52999	0.00345279
FBgn0259938	cwo	1.52824	0.0279043
FBgn0003463	sog	1.52786	0.0458092
FBgn0039828	CG1542	1.52632	0.0100537
FBgn0028494	CG6424	1.52486	0.0380019
FBgn0265512	mlt	1.52132	0.0343876
FBgn0003028	ovo	1.5201	0.0157927
FBgn0285926	Imp	1.51979	0.00663513
FBgn0010222	Nmdmc	1.51943	0.0197872
FBgn0051108	CG31108	1.51882	0.0164751
FBgn0000492	Dr	1.51813	0.00406972
FBgn0031738	CG9171	1.51812	0.00597131
FBgn0035906	GstO2	1.51731	0.00849201
FBgn0003390	shf	1.51659	0.0431301
FBgn0034724	babos	1.51642	0.0472637
FBgn0086687	Desat1	1.51625	0.0201275
FBgn0027865	Tsp96F	1.51159	0.0211681
FBgn0085408	Shroom	1.51143	0.0194582
FBgn0031043	NAA20	1.51092	0.0184754
FBgn0038016	MBD-R2	1.50729	0.0307504
FBgn0026409	Mpcp2	1.50403	0.00172411
FBgn0022361	Pur-alpha	1.50254	0.0161084
FBgn0013305	Nmda1	1.50095	0.0435813
FBgn0052111	CR32111	0.665818	0.0180119
FBgn0263980	CG43729	0.664274	0.0394956
FBgn0033192	Corin	0.664136	0.039526
FBgn0033540	Elp2	0.662315	0.00502208
FBgn0033177	CG11141	0.658986	0.0398744
FBgn0010803	Aats-trp	0.657403	0.0460917
FBgn0004839	otk	0.657061	0.00939826
FBgn0010549	l(2)03659	0.656774	0.0454926
FBgn0024366	CG11409	0.655238	0.0176597
FBgn0041585	olf186-F	0.654275	0.0204968
FBgn0045038	Proc	0.650013	0.020869
FBgn0030305	CG1749	0.646929	0.00766448
FBgn0020312	CG4050	0.644191	0.0493751
FBgn0033652	ths	0.644061	0.0304919
FBgn0034956	CG4324	0.643695	0.0437989
FBgn0283451	CG11509	0.64238	0.00269704
FBgn0032129	jp	0.641117	0.0495266
FBgn0052533	CG32533	0.641002	0.0285795
FBgn0035452	CG10359	0.640682	0.00511175
FBgn0263659	CR43650	0.639577	0.0477409
FBgn0004169	up	0.638806	0.0176028
FBgn0038828	CG17270	0.6366	0.0185054
FBgn0259171	Pde9	0.635507	0.0251035
FBgn0039249	CG11168	0.631967	0.0214886
FBgn0034439	CG10062	0.630483	0.00215539
FBgn0267136	CR45576	0.628986	0.0284547
FBgn0030703	MSBP	0.628916	0.0195947
FBgn0003499	sr	0.628607	0.031032
FBgn0034135	Syn2	0.628311	0.0151262
FBgn0028397	Tob	0.627671	0.0245313
FBgn0031894	CG4496	0.627171	0.0304919
FBgn0052677	X11Lbeta	0.627153	0.0107949
FBgn0038327	Trax	0.626962	0.0437989
FBgn0038532	CG14322	0.626901	0.00148103
FBgn0000251	cad	0.625707	0.0135863
FBgn0036509	CG7739	0.624884	0.00351855
FBgn0028422	GluRIID	0.624815	0.0292962
FBgn0040396	CG3939	0.624066	0.043129
FBgn0035282	CNMa	0.623417	0.0279043
FBgn0037341	CG12746	0.622161	0.045023
FBgn0035104	CG13875	0.621398	0.00837184
FBgn0033558	CG12344	0.621368	0.00112663
FBgn0027091	Aats-cys	0.620907	0.00159021
FBgn0033087	Hsepi	0.620309	0.0482984
FBgn0038788	Sirt2	0.619652	0.0256167
FBgn0031816	CG16947	0.618841	0.0392624
FBgn0038397	CG10185	0.617855	0.0176265
FBgn0032774	CG17549	0.617367	0.0184754
FBgn0025390	Mur2B	0.617277	0.043812
FBgn0003137	Ppn	0.616336	0.00143572
FBgn0040106	lectin-21Cb	0.616324	0.0315387
FBgn0032805	CG10337	0.614323	0.0429331
FBgn0030757	CG9902	0.60934	0.00647516
FBgn0038292	CG3987	0.608488	0.0339481
FBgn0003513	ss	0.608062	0.0023485
FBgn0034242	CG14480	0.607186	0.0210881
FBgn0014033	Sr-CI	0.60645	0.00511175
FBgn0030734	CG9911	0.606319	0.0286922
FBgn0266232	CR44927	0.605761	0.0490048
FBgn0037084	Syx6	0.604268	0.0107865
FBgn0264980	CR44131	0.600389	0.0295143
FBgn0004606	zfh1	0.599674	0.0343962
FBgn0034506	CG13870	0.598868	0.0454672
FBgn0029929	CG4593	0.596879	0.0212414
FBgn0051064	CG31064	0.596606	0.00293475
FBgn0029134	Prosbeta5	0.596515	0.00757554
FBgn0267793	CR45232	0.594913	0.00111788
FBgn0015904	ara	0.593619	0.0284547
FBgn0036510	CG7427	0.593447	0.0211871
FBgn0040211	hgo	0.591705	0.0339481
FBgn0014023	mRpL47	0.590693	0.0350485
FBgn0031273	CG2839	0.590607	0.00545302
FBgn0032080	CG9525	0.59021	0.0225733
FBgn0036515	CG12304	0.589969	0.00585112
FBgn0260967	CG42590	0.589736	0.0479377
FBgn0263617	CR43626	0.589454	0.0258229
FBgn0052204	CG32204	0.58918	0.0453549
FBgn0045843	RacGAP84C	0.588963	0.0342291
FBgn0039354	Lgr3	0.588747	0.0209785
FBgn0033362	CG8172	0.588315	0.030513
FBgn0041623	Or65c	0.58783	0.00495726
FBgn0033117	CG3358	0.587642	0.0281637
FBgn0036731	CG6333	0.586999	0.0489626
FBgn0033761	CG8778	0.585175	0.0431084
FBgn0031866	Nlg2	0.584372	0.0337719
FBgn0031814	retm	0.583903	0.0110243
FBgn0000625	eyg	0.583191	0.0086965
FBgn0010309	pigeon	0.582847	0.0279043
FBgn0085480	CG34451	0.582355	0.0403601
FBgn0041625	Or65a	0.581891	0.0289164
FBgn0038268	CG3631	0.579926	0.0081963
FBgn0261437	CSN8	0.578982	0.0475272
FBgn0033058	CCHa2-R	0.578797	0.00277269
FBgn0262619	DNA-ligI	0.578585	0.00568694
FBgn0035372	CG12093	0.578412	0.0279043
FBgn0015522	olf186-M	0.5784	0.00759727
FBgn0265685	CR44492	0.576731	0.0340912
FBgn0037086	CG7202	0.575505	0.0149099
FBgn0000489	Pka-C3	0.575409	0.00805402
FBgn0038143	CG9813	0.575282	0.0457206
FBgn0085409	CG34380	0.57505	3.02374e-05
FBgn0033958	CG12858	0.574887	0.0315446
FBgn0033756	CG17760	0.574672	0.032923
FBgn0032048	Dh31	0.574337	0.0192754
FBgn0015399	kek1	0.57413	1.35443e-07
FBgn0033405	CG13954	0.572576	0.00531235
FBgn0011762	DNApol-alpha50	0.571831	0.0245313
FBgn0031734	CG11147	0.570354	0.0265182
FBgn0052557	CG32557	0.570133	0.045023
FBgn0038752	CG4462	0.568613	0.0340347
FBgn0028496	CG30116	0.568066	0.0081963
FBgn0020376	Sr-CIII	0.567617	0.00133361
FBgn0031770	CG13995	0.567397	0.0454524
FBgn0030063	CG1789	0.566308	0.00954313
FBgn0037339	Pi4KIIalpha	0.565967	0.000493304
FBgn0036768	CG7402	0.565348	0.0326078
FBgn0026404	Dronc	0.564991	0.0122319
FBgn0036202	CG6024	0.564326	0.045023
FBgn0027611	LManII	0.564244	0.000640918
FBgn0032763	CG17568	0.564068	0.0286247
FBgn0051374	sals	0.563919	0.0125769
FBgn0038200	CG9920	0.561804	0.0173537
FBgn0036436	CG4914	0.56154	0.000306464
FBgn0033728	Cpr49Ae	0.561337	0.0435813
FBgn0037709	CG8199	0.560237	0.0237948
FBgn0026147	CG16833	0.559508	0.000305077
FBgn0250833	CG34461	0.559229	0.0397861
FBgn0051213	CG31213	0.559201	0.0387505
FBgn0030735	CG3632	0.558392	0.00174389
FBgn0036741	CG7510	0.558071	0.00711941
FBgn0003888	betaTub60D	0.556838	0.00152232
FBgn0052112	CG32112	0.55651	0.00511175
FBgn0036512	CG16979	0.556456	0.0304913
FBgn0035976	PGRP-LC	0.556325	0.0400932
FBgn0013563	Pex1	0.554842	0.022131
FBgn0267474	CR45824	0.554404	0.0230631
FBgn0026428	HDAC6	0.554323	0.00160449
FBgn0263745	CR43670	0.55313	0.0313952
FBgn0032047	CG13088	0.553114	0.0139351
FBgn0033357	Tom7	0.552187	0.043614
FBgn0050074	Obp50d	0.551155	0.0221524
FBgn0036485	FucTA	0.549839	0.0195697
FBgn0029082	hbs	0.549751	0.000400803
FBgn0035750	CG14826	0.549522	0.0216087
FBgn0050094	CG30094	0.549439	0.0254562
FBgn0010504	kermit	0.549408	0.00253733
FBgn0005564	Shal	0.549069	0.026077
FBgn0038832	CG15695	0.54843	0.00447187
FBgn0033760	CG8785	0.548343	0.044892
FBgn0265985	CR44764	0.54775	0.0328035
FBgn0033315	beta3GalTII	0.54764	0.0179861
FBgn0033088	PGAP3	0.547109	0.0148725
FBgn0003701	thr	0.546362	0.000515732
FBgn0002938	ninaC	0.546268	0.00808486
FBgn0001216	Hsc70-1	0.54615	0.0131415
FBgn0061198	HSPC300	0.545999	0.0378917
FBgn0053958	CG33958	0.544891	0.0126728
FBgn0266750	CR45223	0.54345	0.000720086
FBgn0036240	CG6928	0.543213	0.00369474
FBgn0032773	fon	0.541668	0.0164362
FBgn0265263	CG42688	0.541382	0.0245313
FBgn0039282	Bili	0.540955	0.0208719
FBgn0039659	CG14506	0.540584	0.0131902
FBgn0004381	Klp68D	0.540056	0.0137927
FBgn0028704	Nckx30C	0.53896	0.0310819
FBgn0263413	CR43459	0.538691	0.000310934
FBgn0015924	crq	0.538646	0.00684047
FBgn0015919	caup	0.538318	3.08115e-06
FBgn0033504	CAP	0.537919	0.021108
FBgn0265149	CR44218	0.537818	0.00684975
FBgn0015039	Cyp9b2	0.537639	0.00513619
FBgn0029121	Sras	0.537315	0.0236341
FBgn0267154	CR45594	0.536188	0.0266146
FBgn0267111	CR45551	0.536117	0.0285764
FBgn0028862	dao	0.535998	0.00251582
FBgn0032629	beat-IIIc	0.535471	0.0333968
FBgn0010114	hig	0.534929	0.000958521
FBgn0265311	CR44284	0.534929	0.0185683
FBgn0034081	CG10731	0.53484	0.0176597
FBgn0035409	CG14963	0.534633	0.0446664
FBgn0002937	ninaB	0.534599	0.0475515
FBgn0263314	CG43400	0.53444	0.0208746
FBgn0036528	CG7579	0.534077	0.0387156
FBgn0263232	Nxf3	0.534066	0.000720086
FBgn0039641	CG14511	0.533825	0.0435813
FBgn0030161	CG15249	0.533818	0.0408111
FBgn0036232	CG14125	0.533803	0.0255253
FBgn0038833	CG15696	0.533341	0.0285764
FBgn0024293	Spn43Ab	0.533241	0.00543676
FBgn0264954	fd3F	0.533123	0.00307393
FBgn0261930	vnd	0.53299	0.00585112
FBgn0033326	CG14743	0.532388	0.0107374
FBgn0028573	prc	0.530921	0.0255198
FBgn0001285	Jon44E	0.529954	0.0416246
FBgn0036316	CG10960	0.529929	0.000114089
FBgn0052284	CG32284	0.529345	0.0328035
FBgn0036742	CG7497	0.528582	0.00345544
FBgn0265679	CR44486	0.527733	0.00691778
FBgn0038054	CG5509	0.527612	0.0131415
FBgn0264086	CG43755	0.527557	0.0279043
FBgn0036738	CG7542	0.527521	0.0310819
FBgn0037313	CG1161	0.52713	0.00970853
FBgn0035625	Blimp-1	0.526827	0.00531917
FBgn0039108	CG10232	0.525918	0.0399974
FBgn0259140	CG42255	0.524742	0.000341504
FBgn0038076	Cyp313a4	0.52444	0.0325719
FBgn0003060	CG9757	0.524193	0.0120832
FBgn0033968	hui	0.523666	0.00511175
FBgn0015008	Actn3	0.523449	0.0218571
FBgn0040297	Nhe2	0.523405	0.00126113
FBgn0027790	GV1	0.522984	4.26277e-05
FBgn0052404	Cpr65Aw	0.522115	0.0340347
FBgn0036205	CG14131	0.521949	0.0343876
FBgn0265078	CR44189	0.521569	0.0446664
FBgn0266828	CR45290	0.521128	0.0447249
FBgn0033981	Cyp6a21	0.519829	0.0495903
FBgn0052668	CG32668	0.51979	0.0259073
FBgn0030455	CG4318	0.519739	0.0492252
FBgn0263079	CG43338	0.519682	0.0248699
FBgn0265301	CR44274	0.519617	0.0476585
FBgn0085396	CG34367	0.519534	0.0240262
FBgn0035833	CG7565	0.519322	1.47219e-05
FBgn0033395	Cyp4p2	0.519293	0.00792723
FBgn0083973	CG34137	0.519293	0.0481516
FBgn0051870	CG31870	0.519052	0.0313952
FBgn0264715	CR43983	0.519048	0.047995
FBgn0010263	Rbp9	0.518739	0.00194422
FBgn0265929	CR44718	0.51807	0.0450069
FBgn0267794	CR43174	0.517496	0.00138447
FBgn0050065	CG30065	0.517252	0.0437942
FBgn0037727	CG8358	0.517195	0.0178636
FBgn0031813	CG9527	0.517055	0.000474113
FBgn0265629	CG44437	0.517012	0.0379175
FBgn0267257	CR45693	0.516858	0.0431084
FBgn0050076	CG30076	0.516654	0.0290387
FBgn0266100	CG44837	0.51597	0.0475272
FBgn0039850	CG11333	0.515888	0.0482984
FBgn0038198	Npc2b	0.515874	0.0244143
FBgn0267233	CR45673	0.515295	0.0394054
FBgn0038784	CG4362	0.515084	0.0285764
FBgn0033602	Cpr47Ee	0.514777	0.0474653
FBgn0032439	Ref2	0.514495	0.0364334
FBgn0259713	CG42367	0.514296	0.0369611
FBgn0265959	rdgC	0.513562	0.0320834
FBgn0032449	CG17036	0.513213	0.0148452
FBgn0031424	VGlut	0.513202	0.00459777
FBgn0032303	CG6508	0.513135	0.0285764
FBgn0038099	CG7091	0.513131	0.0495991
FBgn0038674	CG14285	0.513124	0.0478796
FBgn0266942	CR45393	0.512843	0.0055559
FBgn0038422	CG14880	0.512563	0.017588
FBgn0034660	lox2	0.512467	0.0493751
FBgn0011281	Obp83a	0.512314	0.0483366
FBgn0052150	CG32150	0.512041	0.02673
FBgn0267655	CR45993	0.511884	0.0018306
FBgn0030578	CG5347	0.511835	0.0479731
FBgn0033141	CG12831	0.511352	0.0438609
FBgn0010403	Obp83b	0.511299	0.0432887
FBgn0266791	CR45256	0.511161	0.032923
FBgn0051278	CG31278	0.510871	0.0135652
FBgn0026417	Hus1-like	0.510379	0.00253733
FBgn0266620	CR45127	0.509643	0.0117762
FBgn0030688	CG8952	0.509421	0.0285795
FBgn0015025	CkIIalpha-i1	0.509089	0.0181314
FBgn0038892	CG15498	0.509011	0.0285795
FBgn0053282	CG33282	0.50898	0.0446664
FBgn0043530	Obp51a	0.508976	0.0345713
FBgn0262986	CG43294	0.508976	0.0431084
FBgn0032204	CG4953	0.508268	0.0185194
FBgn0263076	Klp54D	0.508028	0.0121038
FBgn0024941	RSG7	0.507856	0.0398744
FBgn0033277	CG14760	0.507511	0.0289164
FBgn0032428	CG6405	0.507475	0.0179516
FBgn0003886	alphaTub85E	0.507236	0.0436397
FBgn0027074	CG17324	0.507141	0.0341905
FBgn0037324	Orco	0.507008	0.0356982
FBgn0051901	Mur29B	0.506748	0.00779916
FBgn0261857	CR42786	0.506165	0.0435813
FBgn0033982	Cyp317a1	0.505934	0.0164362
FBgn0085489	CG34460	0.504974	0.0427199
FBgn0040601	CG13643	0.504963	0.00193178
FBgn0265530	CR44380	0.504452	0.0341905
FBgn0035626	lin-28	0.504264	0.015091
FBgn0051005	qless	0.503886	0.00010638
FBgn0262366	CG43064	0.503768	0.0428519
FBgn0037100	CapaR	0.502763	0.0365753
FBgn0036229	CG7248	0.502693	0.0202201
FBgn0267473	CR45823	0.502665	0.00805402
FBgn0038132	CG15887	0.502547	0.0332819
FBgn0050487	CG30487	0.502456	0.00296927
FBgn0259917	CG42446	0.502112	0.0413257
FBgn0250844	CG4218	0.501576	0.0381212
FBgn0259977	Tdc1	0.501437	0.0246484
FBgn0036482	CG13457	0.50118	0.00227405
FBgn0034484	CG11044	0.501114	0.00766448
FBgn0011676	Nos	0.500815	0.000954549
FBgn0053127	CG33127	0.500649	0.0387505
FBgn0260004	Snmp1	0.500277	0.0308004
FBgn0001319	kn	0.500135	0.000147335
FBgn0263746	CR43671	0.49982	0.0365196
FBgn0263974	qin	0.499799	0.00431465
FBgn0020280	laf	0.499584	0.0103509
FBgn0038199	CCHa1	0.499467	0.00579717
FBgn0000639	Fbp1	0.49921	0.0223123
FBgn0030723	dpr18	0.499093	0.00339092
FBgn0036937	Ir76b	0.498526	0.0380019
FBgn0050222	CG30222	0.498225	0.0353453
FBgn0038567	CG14316	0.498208	0.0356982
FBgn0263049	let-7-C	0.498011	0.0248771
FBgn0038866	CG5810	0.497925	0.0251035
FBgn0266970	CR45421	0.497825	0.0290263
FBgn0031292	CG15824	0.497628	0.00805402
FBgn0026755	Ugt37b1	0.497625	0.0212414
FBgn0031240	CG3345	0.495309	0.0292717
FBgn0266233	CR44928	0.495202	0.00586257
FBgn0036310	CG10969	0.495089	0.0189735
FBgn0050106	CCHa1-R	0.494996	0.0286922
FBgn0036285	toe	0.49489	0.00759459
FBgn0031239	CG17075	0.494547	0.0357869
FBgn0020642	Lcp65Ac	0.494472	0.0355194
FBgn0038161	CG9269	0.494194	0.0274459
FBgn0053519	Unc-89	0.493985	0.00845147
FBgn0265824	CR44613	0.493698	0.0311189
FBgn0263489	CR43604	0.493612	0.0316055
FBgn0265634	CR44441	0.493195	0.0287805
FBgn0262000	CG42818	0.492894	0.00185701
FBgn0267240	CR45680	0.492737	0.0116566
FBgn0267817	CR46142	0.492467	0.0311121
FBgn0030300	Sk1	0.491383	0.0270427
FBgn0050419	CG30419	0.491281	0.00329549
FBgn0034990	CG11406	0.490753	0.00185701
FBgn0038607	hmw	0.490461	0.0169718
FBgn0035823	eIF4E-5	0.490301	0.00319151
FBgn0263037	CG43332	0.490094	0.00138447
FBgn0039343	CG5111	0.489826	0.0318728
FBgn0266758	Esyt2	0.48827	0.00992995
FBgn0038980	Octbeta1R	0.48733	0.000857657
FBgn0050275	CG30275	0.487043	0.00138447
FBgn0039378	alpha4GT2	0.486553	0.0303786
FBgn0052106	CG32106	0.486469	0.000396956
FBgn0031483	CG9641	0.486408	0.000766649
FBgn0036427	CG4613	0.486176	0.0290387
FBgn0285879	disco-r	0.485607	0.00533125
FBgn0004618	gl	0.484877	0.00073273
FBgn0052088	CG32088	0.484547	0.00493711
FBgn0259184	CG42288	0.48448	0.00326458
FBgn0013811	Dhc62B	0.48441	0.0023485
FBgn0011906	tRNA:L2:44EF	0.483823	0.0286247
FBgn0030558	CG1461	0.483762	0.0228812
FBgn0039225	Ets96B	0.483756	0.00461673
FBgn0052181	CG32181	0.483367	0.0284547
FBgn0019928	Ser8	0.482938	0.0241936
FBgn0265446	CR44346	0.481634	0.0164751
FBgn0032973	CG6675	0.48098	0.0201665
FBgn0040260	Ugt36Bc	0.480131	0.0196848
FBgn0036391	CG17364	0.480094	3.43764e-05
FBgn0264540	CG43919	0.480048	0.0251203
FBgn0031258	CG4297	0.478148	0.0216035
FBgn0015037	Cyp4p1	0.476484	0.00358966
FBgn0266757	mfr	0.476421	0.0075182
FBgn0033593	Listericin	0.476286	0.020696
FBgn0036236	CG6931	0.475234	0.00975125
FBgn0051921	CG31921	0.475158	0.00831007
FBgn0086408	stl	0.474895	0.0233755
FBgn0003896	tup	0.474711	0.000396956
FBgn0035623	mthl2	0.474309	0.0164751
FBgn0034768	Obp58b	0.474181	0.013648
FBgn0038160	CG9759	0.473967	0.0055559
FBgn0031522	CG3285	0.473738	0.023782
FBgn0034122	CG15711	0.473655	0.0185194
FBgn0267571	CR45911	0.472112	0.00208747
FBgn0035491	Dpy-30L2	0.472033	0.0186944
FBgn0037107	CG7166	0.471686	0.0120832
FBgn0000299	Cg25C	0.471389	0.000200404
FBgn0053093	CG33093	0.469709	0.0164362
FBgn0029975	CG1444	0.469342	0.0202916
FBgn0263582	CR43607	0.469159	0.00345344
FBgn0036953	CG17145	0.468851	0.020869
FBgn0266398	CR45038	0.468315	0.0212414
FBgn0264488	CG43896	0.468305	0.0003472
FBgn0261526	NT1	0.468139	0.000220707
FBgn0039839	ppk24	0.467948	0.0104169
FBgn0031513	CG3347	0.467821	0.0208013
FBgn0040650	CG15456	0.465999	0.00779916
FBgn0004400	rhi	0.464835	0.00461673
FBgn0040349	CG3699	0.464252	0.0199025
FBgn0024294	Spn43Aa	0.464246	3.04008e-05
FBgn0038163	CG10841	0.463676	0.000921615
FBgn0004872	piwi	0.462559	0.00106259
FBgn0259189	Ir7e	0.462194	0.00316148
FBgn0035934	TrpA1	0.461701	0.00307229
FBgn0040629	CG18673	0.461534	0.0151894
FBgn0265963	CR44750	0.461349	0.0185194
FBgn0034659	CG4021	0.460962	0.0185378
FBgn0036208	CG10361	0.460684	0.0100943
FBgn0040628	CG18672	0.460643	0.0185683
FBgn0038709	CG15025	0.460391	0.0086965
FBgn0053281	CG33281	0.459593	0.01815
FBgn0261998	CG42816	0.459221	0.0137927
FBgn0039505	CG5934	0.458899	0.00238353
FBgn0034082	CG10734	0.4576	0.00361833
FBgn0035529	CG1319	0.456808	0.00632239
FBgn0037601	Cyp313b1	0.456599	0.00852784
FBgn0037548	CG7900	0.455685	0.000114089
FBgn0031762	CG9098	0.455136	0.000465004
FBgn0266706	CR45196	0.453404	0.0084575
FBgn0266565	CR45104	0.453209	0.0156981
FBgn0052580	Muc14A	0.451548	0.00883439
FBgn0036235	CG6938	0.451438	0.000192888
FBgn0265305	CR44278	0.450666	0.0134155
FBgn0031826	CG9550	0.450488	0.0135321
FBgn0264705	CR43974	0.450463	1.66074e-05
FBgn0022027	Vps25	0.448967	0.00173739
FBgn0004118	nAChRbeta2	0.448444	0.0137523
FBgn0266355	CR45003	0.446434	0.0116064
FBgn0264908	pHCl	0.445232	0.0084575
FBgn0051760	CG31760	0.444221	0.0034422
FBgn0266255	CR44950	0.443517	0.00328201
FBgn0053673	CG33673	0.442669	0.00665951
FBgn0265821	CR44610	0.440911	0.0114173
FBgn0029175	Ext2	0.440517	0.000194513
FBgn0267248	CR45688	0.440346	0.000775204
FBgn0038789	Ir92a	0.438996	0.00526883
FBgn0283471	wupA	0.438564	0.0107016
FBgn0270925	CG4836	0.438257	0.0107015
FBgn0283651	CG17341	0.43755	0.000220707
FBgn0050158	CG30158	0.437004	0.000314368
FBgn0015038	Cyp9b1	0.433914	4.26277e-05
FBgn0263870	CR43717	0.433823	0.00358966
FBgn0015550	tap	0.433475	0.00718578
FBgn0052250	PMP34	0.432338	0.00249976
FBgn0260393	CG17147	0.430901	0.00811499
FBgn0039223	CG5805	0.428953	0.00161203
FBgn0034365	CG5335	0.427599	0.00491838
FBgn0265984	CR44763	0.427391	0.0031969
FBgn0053120	CG33120	0.423652	0.00024009
FBgn0038201	PK1-R	0.423267	0.00164181
FBgn0085422	CG34393	0.421923	0.00697296
FBgn0028746	CG18508	0.421262	0.000294037
FBgn0000449	dib	0.421139	0.00146918
FBgn0032122	CG31883	0.421066	0.000920745
FBgn0038246	CG14853	0.419982	0.00328201
FBgn0037105	S1P	0.418828	0.000114089
FBgn0037275	CG14655	0.417874	0.00185364
FBgn0266858	CR45319	0.417396	0.000352877
FBgn0052655	CG32655	0.416948	0.00170448
FBgn0267572	CR45912	0.416726	0.00422169
FBgn0085254	CG34225	0.416356	0.00108917
FBgn0083946	lobo	0.414893	0.00328201
FBgn0030725	CG8958	0.413145	0.000516129
FBgn0038652	CG7720	0.411031	0.000921615
FBgn0266251	CR44946	0.410476	4.73033e-05
FBgn0267755	CR46086	0.40989	0.00469901
FBgn0050268	CG30268	0.408965	3.43764e-05
FBgn0011279	Obp69a	0.408368	0.00466665
FBgn0263744	CR43669	0.408356	0.00345344
FBgn0051948	CG31948	0.405746	0.00431465
FBgn0050259	CG30259	0.40462	0.000882354
FBgn0030926	psh	0.404141	0.000782956
FBgn0038136	CG8774	0.404124	0.00346675
FBgn0031903	Wnt10	0.403259	0.000414183
FBgn0085385	CG34356	0.400224	0.00145073
FBgn0034957	CG3121	0.398828	0.00267325
FBgn0013751	Awh	0.397934	0.000149634
FBgn0041102	ocn	0.39689	0.00324669
FBgn0031375	erm	0.396453	0.00016213
FBgn0036230	CG11570	0.396329	0.0017104
FBgn0261289	CheB98a	0.396153	0.00217537
FBgn0265533	CR44383	0.39195	0.00217454
FBgn0033138	Tsp42Eq	0.391483	0.0026348
FBgn0036931	CG14183	0.390875	0.000683777
FBgn0011828	Pxn	0.390317	3.16477e-05
FBgn0028863	CG4587	0.390066	0.000306464
FBgn0053310	CG33310	0.38995	0.00143572
FBgn0265356	tn	0.389123	0.000720086
FBgn0051146	Nlg1	0.38884	0.00193178
FBgn0036890	CG9368	0.387939	6.83883e-05
FBgn0000644	Fcp3C	0.387275	8.90002e-06
FBgn0046885	Gr98d	0.38206	0.0017104
FBgn0033090	CG15909	0.381541	0.00191937
FBgn0265636	CR44443	0.3812	6.87393e-05
FBgn0032331	CG14913	0.380324	1.6547e-05
FBgn0032176	CG13127	0.379823	0.00174
FBgn0033397	Cyp4p3	0.378226	4.86158e-06
FBgn0020299	stumps	0.376489	4.26277e-05
FBgn0039678	Obp99a	0.372517	0.00138447
FBgn0033139	Tsp42Er	0.369122	0.000310934
FBgn0004117	Tm2	0.368064	0.000412656
FBgn0036544	sff	0.366865	0.000719909
FBgn0031504	CG15403	0.364232	0.000965128
FBgn0052581	CG32581	0.35993	0.000306464
FBgn0013813	Dhc98D	0.359128	7.85084e-07
FBgn0039616	CG11828	0.359116	0.000328826
FBgn0039523	CG12885	0.357811	0.000584669
FBgn0265316	CR44289	0.356976	0.000400803
FBgn0032506	CG9395	0.354751	0.000560178
FBgn0037448	CG15186	0.353571	0.000418635
FBgn0264005	Hmx	0.352118	0.000535579
FBgn0013672	mt:ATPase6	0.344036	1.59381e-10
FBgn0027527	Osi6	0.341569	0.000369857
FBgn0050323	CG30323	0.338747	6.83883e-05
FBgn0053547	Rim	0.338458	1.43178e-09
FBgn0039585	CG1894	0.330557	2.42149e-05
FBgn0039617	DIP-gamma	0.326782	4.37987e-05
FBgn0038783	CG4367	0.325412	9.79072e-06
FBgn0031257	CG4133	0.323898	2.91816e-05
FBgn0262477	FoxP	0.316187	2.02147e-06
FBgn0012037	Ance	0.310243	1.39256e-09
FBgn0046887	Gr98b	0.308904	4.26277e-05
FBgn0260446	GABA-B-R1	0.301586	6.63936e-07
FBgn0037412	Osi4	0.29982	4.26277e-05
FBgn0265315	CR44288	0.297861	1.63842e-05
FBgn0260964	Vmat	0.283042	1.30146e-06
FBgn0050395	CG30395	0.278682	3.52885e-07
FBgn0004863	C15	0.261902	2.76844e-07
FBgn0263613	CR43622	0.259731	1.66593e-06
FBgn0003117	pnr	0.209635	1.99571e-17
